# Supplementary material
Source: publisher site journal article supplement (https://www.spandidos-publications.com/2706/downloadSupplementary)

Figure S1. Effects of miR-22 mimic and miR-22 inhibitor transfection and CAV3 siRNA on miR-22 and CAV3 expression at mRNA and protein levels in osteoblastic MC3T3-E1 cells. Osteoblasts were transfected with (A) miR control or miR-22 mimic (200 nM) and (B) miR-22 inhibitor control or miR-22 inhibitor (200 nM) for 24 h. Reverse transcription-quantitative PCR was performed to measure the expression of miR-22. (C and D) Osteoblasts were transfected with control siRNA or CAV3 siRNA for 24 h. Reverse transcription-quantitative PCR and western blot analysis were performed to determine CAV3 (C) mRNA and (D) protein expression levels, respectively, in osteoblasts. Data are shown as the mean  $\pm$  standard error of the mean (n=4). \*\*P<0.01 vs. control.

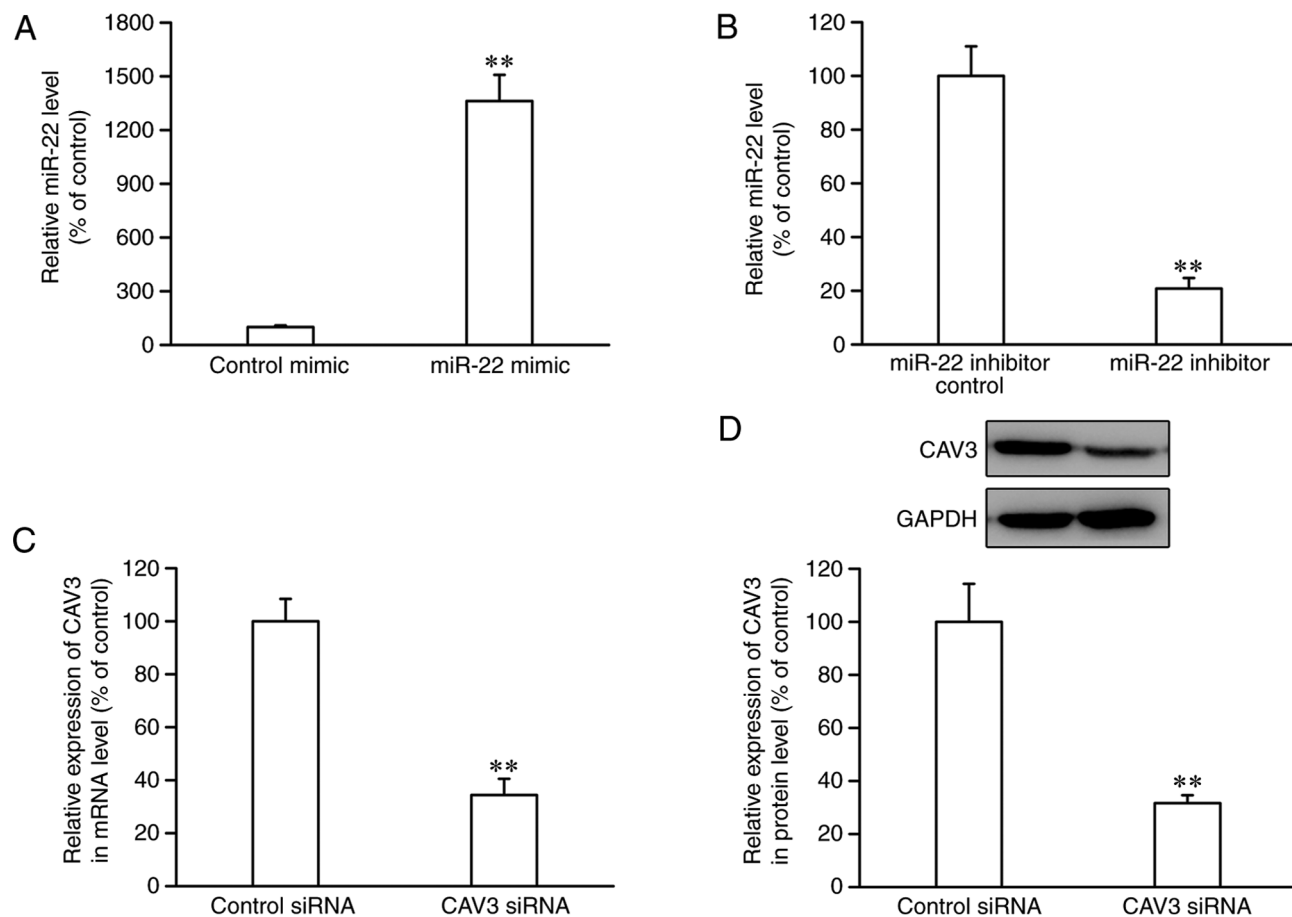

Supplement: Supplementary file 1 [file downloadSupplementary]
